# Supplementary material for: Discovery of Novel Rhabdoviruses in the Blood of Healthy Individuals from West Africa
Source: PubMed Central journal article supplement (PMC4363514; doi:10.1371/journal.pntd.0003631), 2015-03-17

|                     | Febrile<br>(n=195) | Afebrile<br>(n=328) |
|---------------------|--------------------|---------------------|
| <b>Gender (M/F)</b> | 51/49              | 49/51               |
| <b>Age (median)</b> | 2-79 (33)          | 1-98 (45)           |

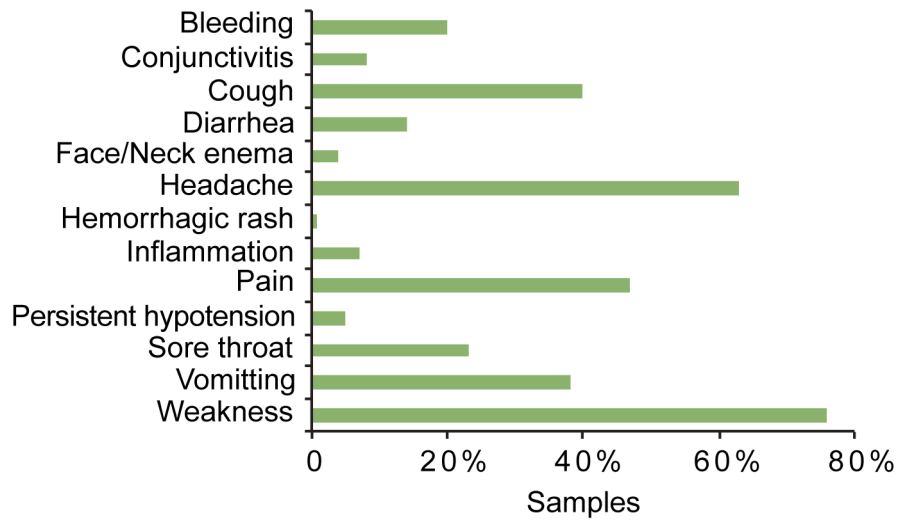

Supplement: pntd.0003631.s001.pdf [file pntd.0003631.s001.pdf]
