# Supplementary material for: Discovery of Novel Rhabdoviruses in the Blood of Healthy Individuals from West Africa
Source: PubMed Central journal article supplement (PMC4363514; doi:10.1371/journal.pntd.0003631), 2015-03-17

**A**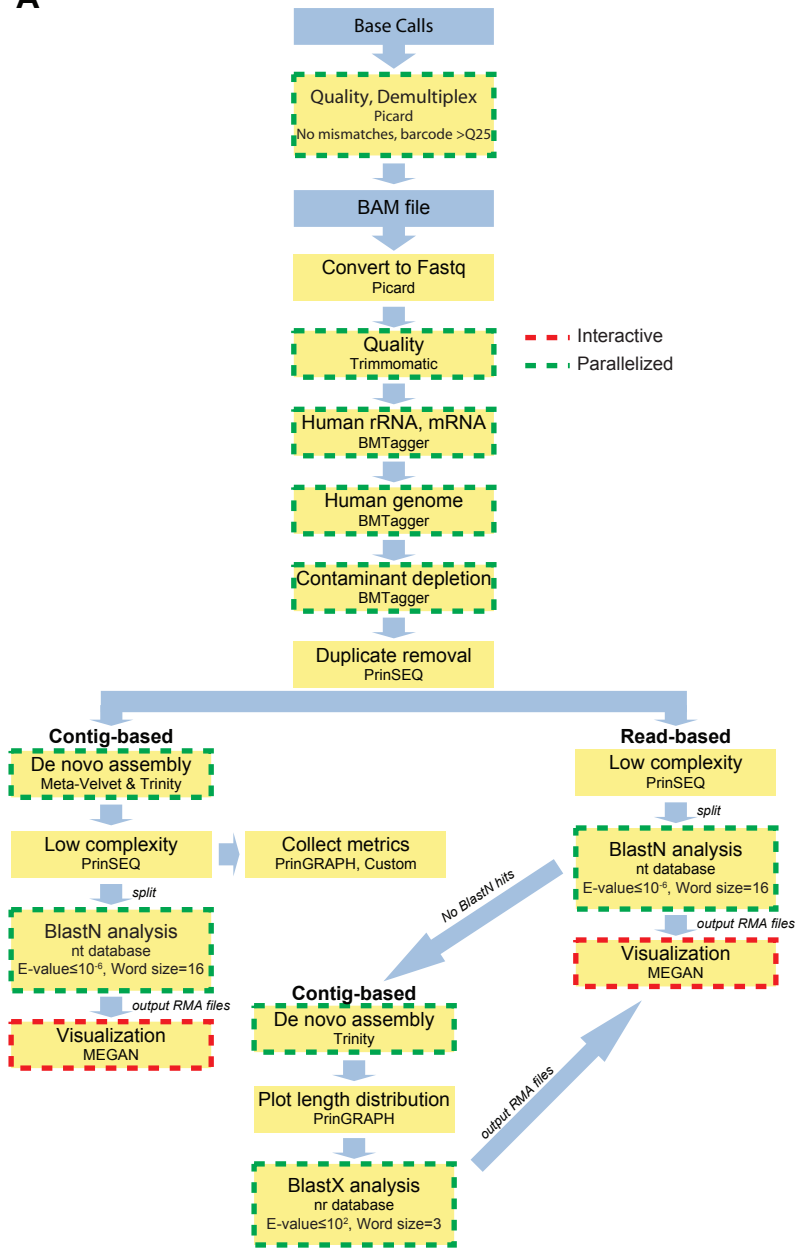**B**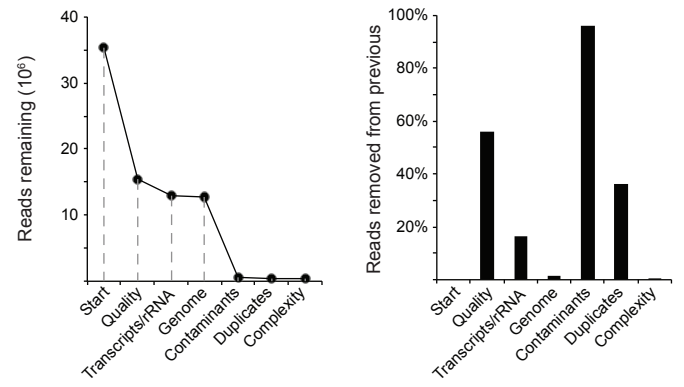**C**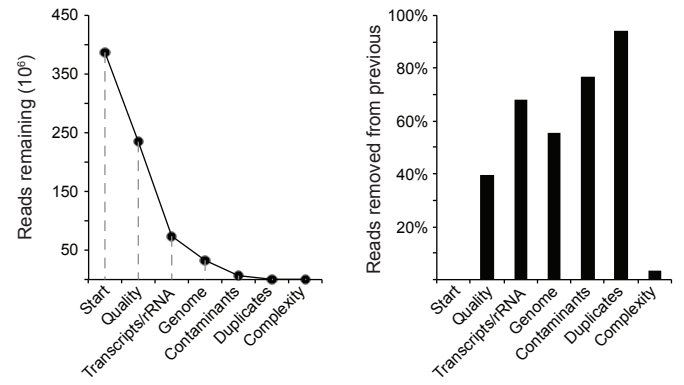**D**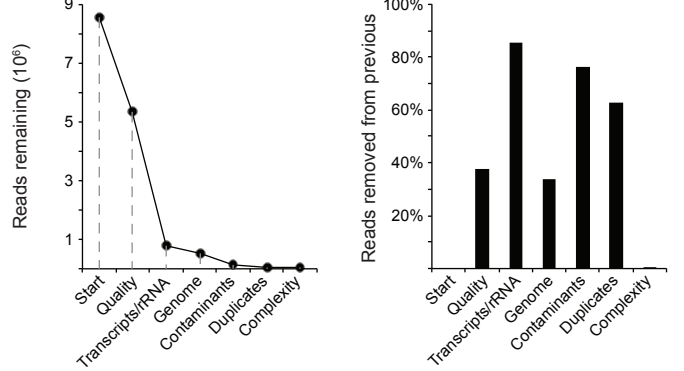

Supplement: pntd.0003631.s002.pdf [file pntd.0003631.s002.pdf]
