# Supplementary material for: Discovery of Novel Rhabdoviruses in the Blood of Healthy Individuals from West Africa
Source: PubMed Central journal article supplement (PMC4363514; doi:10.1371/journal.pntd.0003631), 2015-03-17
Supplement: pntd.0003631.s003.pdf [file pntd.0003631.s003.pdf]

|             | Positive? |     | Fisher test |         |
|-------------|-----------|-----|-------------|---------|
|             | No        | Yes | Odds ratio  | P-value |
| <i>LASV</i> |           |     |             |         |
| UAFI        | 16        | 104 | 18.47       | 0.002   |
| Healthy     | 0         | 58  |             |         |

|         | No                | Yes | Odds ratio | P-value    |
|---------|-------------------|-----|------------|------------|
|         | <i>GB virus C</i> |     |            |            |
| UAFI    | 95                | 25  | 0.54       | 0.097 (ns) |
| Healthy | 39                | 19  |            |            |

|         | No                    | Yes | Odds ratio | P-value    |
|---------|-----------------------|-----|------------|------------|
|         | <i>Ekpoma viruses</i> |     |            |            |
| UAFI    | 120                   | 0   | 0.09       | 0.105 (ns) |
| Healthy | 56                    | 2   |            |            |
