# Supplementary material for: Discovery of Novel Rhabdoviruses in the Blood of Healthy Individuals from West Africa
Source: PubMed Central journal article supplement (PMC4363514; doi:10.1371/journal.pntd.0003631), 2015-03-17

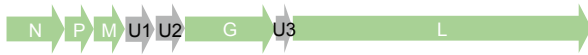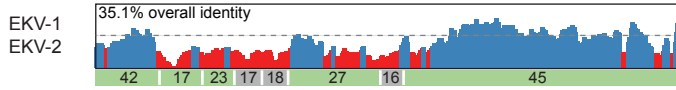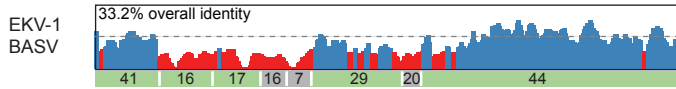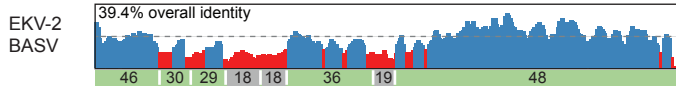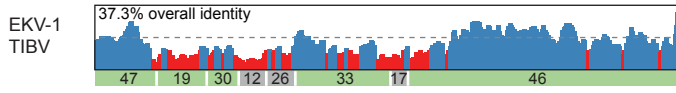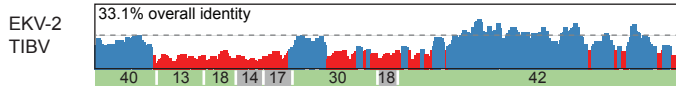

Supplement: pntd.0003631.s004.pdf [file pntd.0003631.s004.pdf]
