# Supplementary material for: Discovery of Novel Rhabdoviruses in the Blood of Healthy Individuals from West Africa
Source: PubMed Central journal article supplement (PMC4363514; doi:10.1371/journal.pntd.0003631), 2015-03-17
Supplement: pntd.0003631.s005.pdf [file pntd.0003631.s005.pdf]

1 10 20 30 40 50 60

Ekpoma-1 MYCLLNKKNVECKLPSEAPTQYTFSEFESNNHQKPSVKFRLQLDQTFQOIRCLVKGGLRSSLSD

Ekpoma-2 MFSTLNSKTLSCALPQDDSTYOYPADYFK-NQKKRIVRLEPKPLHTLDELRLIICKGLRASK

Bas-Congo PRTYFESNGFKKESLRLEKSNLSLKDRLREIICKSLKAST

Tibrogargan MHCIVTSTSIKLTAPSPSDTIDVOYCSDYFEKNNKQKPKINLEKLPVGLAELRALVKGGFKAND

70 80 90 100 110 120

Ekpoma-1 LKIQHAMHF LRHYLESIKNELKSDWVSHGVEIGVSGNEITPLTILIKVELAPAQLQDGVQAND

Ekpoma-2 LDTSHILMYMRLVLETIKEDVQREWESFNLKLRVGDQIGPLDLEIEDYDEKQRDGTKDQA

Bas-Congo IDPEYTLFLKQYVTRFKAQIAEDWISFDVKIGRAGETLSPINLFAIEEYDPKLRDMVKDTT

Tibrogargan LKQLHVLAYLGHLLQDIKGEELTE DWT SFGVLIGNRSHNITPLDLDVNY YDKLLDGVKAND

130 140 150 160 170 180

Ekpoma-1 ATEADDMMAMTILGIFRIGRTSNAQYRATLMARLNTQIKCLINQDAIPLVDVNLMGSFINN

Ekpoma-2 GDREDDHWIMLILGFIYRINKISHNQYRAMSISKLNQOANNINPEAIKLDNPMISMICSN

Bas-Congo AEDDDHMMAFVLLSIYRISKVLPAYRATLIGKMNQAQGINNALKVLDNVIFNVLSNSN

Tibrogargan ASQSDDAWMLFACLGIIYRLARTQNLQHRSSILMKMNAQILSLINQNAIKLVDNTMFWNSWISN

190 200 210 220 230 240

Ekpoma-1 PMYVKKVAVVDMYFNMFREDERSILRFGLTGSRYQDCSSIMSSHLTSLTGLPLETVLDWEIF

Ekpoma-2 PNFSKLVAAVDMFLYENKESDRSLWRGGSVACRYENCAALTTISHLTDILGKNLEDILPWF

Bas-Congo NSYVKKLVAGTDMILFRMGDGEHSLYRWGTVVTREHEDGSALLSIAHICKLLGKEIEFLEWEIF

Tibrogargan YNYTKLIACDMFPFYKFKDHEHAVCRFGTIPSRWKDCGGTSLSHLKNLTGMELEEIVSWVF

250 260 270 280 290 300 310

Ekpoma-1 VESIGREMLAMLKEGOELDNPNSTPYMMPGLGLSTKSPYSAS YAPGTYTLIHIIGSIMHSTR

Ekpoma-2 IETIGHEVERILEPGOELDNVRSTPYCHAYGISQKIPYSATAAPGLYTLCHLIGLLHSPR

Bas-Congo VNSVGRDVEKILEPGOELDKPYSYGYMKGGLGLVTRSIYASASACSNLTYTFC HMLCAVLSHR

Tibrogargan VPSIGKEICRMMSGOELDKPDSYVYMMMDLGLSMKSPYSSANGGTYTWHMIGSIMHSQR

320 330 340 350 360 370

Ekpoma-1 SYHARMVSDSNIANIKINALVMAYVLSNKGSLRKVFVKEEYKDIFGDDNK--RDQEDDDSVVD

Ekpoma-2 SQNARIVTERNMVNIRINATLIAFVLGSKGSLKQIFVKEETDKHKVINPKT--TGGADNESLD

Bas-Congo SKHARMINEGNLNIKLNNTSVIAWVLGSRGSLVQIFVKNRSRDEVLSKQTKNQKIEETDSL

Tibrogargan SLHARMVNEENELPNIRISAMLTAYVKFNKGSLMKVVFVKEEDKHL YIGED---QDENEGNSD

380 390 400 410 420 431

Ekpoma-1 SLDLDELFRSNDEI EWYNWLESNSFEIPEKLMGVMKRECRKISGTRPNIVGHVYSTMA

Ekpoma-2 SFDLDEIPNSSDPHEWYHYLYTRDFELPKEIVEVMKKEARKITNIRPNTIGHYISTTF

Bas-Congo SFDDEDEIPQTSDPHEWYDYLAARRDFDIPDVLMAVRNEAKKLVGTRIGTIGHYVQTTY

Tibrogargan YIDLTOHENTDSADDNYQWLEINNFETLDDILKDSITRECKKIQNTFRAGTIGSYIQTTLS

|             | Ekpoma-1 | Ekpoma-2 | Bas-Congo | Tibrogargan |
|-------------|----------|----------|-----------|-------------|
| Ekpoma-1    |          | 41.4%    | 40.3%     | 47.3%       |
| Ekpoma-2    | 41.4%    |          | 45.5%     | 39.5%       |
| Bas-Congo   | 40.3%    | 45.5%    |           | 39.8%       |
| Tibrogargan | 47.3%    | 39.5%    | 39.8%     |             |
