# Supplementary material for: Discovery of Novel Rhabdoviruses in the Blood of Healthy Individuals from West Africa
Source: PubMed Central journal article supplement (PMC4363514; doi:10.1371/journal.pntd.0003631), 2015-03-17
Supplement: pntd.0003631.s010.pdf [file pntd.0003631.s010.pdf]

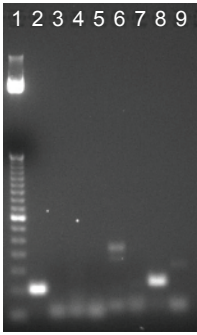

1. Ladder
2. EKV-1 primer set, 13M - original sample
3. EKV-1 primer set, 13M - follow up sample
4. EKV-1 primer set, 49C - original sample
5. EKV-1 primer set, 49C - follow up sample
6. EKV-2 primer set, 13M - original sample
7. EKV-2 primer set, 13M - follow up sample
8. EKV-2 primer set, 49C - original sample
9. EKV-2 primer set, 49C - follow up sample
