# Supplementary material for: Discovery of Novel Rhabdoviruses in the Blood of Healthy Individuals from West Africa
Source: PubMed Central journal article supplement (PMC4363514; doi:10.1371/journal.pntd.0003631), 2015-03-17
Supplement: pntd.0003631.s018.pdf [file pntd.0003631.s018.pdf]

## 1 **Supplementary Text - Additional information about the identified** 2 **viruses**

### 3 4 **Human Adenovirus C**

5 We believe that reads from human adenovirus C, which were identified in 96% of  
6 the samples (median 34 reads/sample), were contaminants from the library preparation  
7 process. We treat all of our samples with DNase; therefore, we should not detect DNA  
8 viruses. Furthermore, when the adenoviral reads are realigned to the complete 35.9kb  
9 human adenovirus C genome (GenBank accession: NC\_001405), the reads only align  
10 to a relatively narrow 7.7kb region of the genome from ~10,929 – 18,626. We never  
11 identify reads that align to other parts of the genome. Since adenoviruses are widely  
12 used as vectors for cloning and protein expression, we think it is likely the adenoviral  
13 reads come from contamination during the library preparation process. We have not  
14 attempted to amplify human adenovirus C directly from our plasma samples.  
15

### 16 **Dengue Virus**

17 We identified one sample with dengue virus. This sample only contained 8  
18 paired-end reads. We attempted to PCR dengue directly from the patient's plasma, but  
19 no amplification product could be detected. We also attempted to realign the reads from  
20 this sample to multiple full-length dengue virus genomes to determine if there were  
21 additional reads present in the sample. However, we did not find any additional reads.  
22 Dengue virus RNA copies can fall precipitously after the acute phase even though the  
23 patient remains ill. Therefore, it is possible our attempts to detect dengue were too late.  
24 This situation highlights the limits of using nucleic acids to detect viral infections, even  
25 very sensitive methods such as next-generation sequencing. Serological assays are  
26 needed to provide further evidence this patient was actually infected with dengue virus.  
27

### 28 **Lassa Fever**

29 The significant number of Lassa-positive samples is not surprising because our  
30 study was conducted in a Lassa-endemic region; however, we note that all of the  
31 samples were pre-screened specifically for Lassa. Thus, we analyzed the Lassa  
32 diagnostic primer binding site in several samples to determine if divergent Lassa  
33 variants were escaping amplification. We found no evidence of polymorphisms in the  
34 primer binding site that would prevent detection by the conventional PCR assay used at  
35 ISTH. It is possible that the Lassa reads identified in our libraries are contaminants from  
36 other samples processed in the same laboratory (whether in Nigeria or the U.S.). The  
37 median number of Lassa reads in the RNA-seq libraries is only 30. Only one library  
38 contained more than 1,000 Lassa reads. The number of Lassa reads is lower than  
39 usually observed in infected patients.  
40

### 41 **Hepatitis B**

42 One sample (602) contained 4,760 hepatitis B reads and 6,425 HIV-1 reads. It is  
43 possible that in this individual we detected Hepatitis B transcripts—not the DNA  
44 genome. Although we use centrifugation to separate the buffy coat from the plasma,

45 some of the infected cells in this sample may have lysed. The released RNA remained  
46 in the plasma fraction and was transcribed into cDNA as part of the library construction  
47 process.

48

### 49 **Single-Stranded RNA Viruses**

50 We discovered several single-stranded RNA viruses associated with marine  
51 environments and plants. These viruses included bacillariornaviruses, dicistroviruses,  
52 labyrinthnaviruses, marine JB-like viruses, ourmiaviruses, plasmoparaviruses, and  
53 tombusviruses. In each case, the reads we identified were less than 50% similar at the  
54 amino acid level to the next closest match in GenBank. Thus, we believe that these  
55 particular viruses have not been previously described. We were able to assemble a  
56 complete, or nearly complete, genome of the novel bacillariornavirus. The assembled  
57 genome was 9.3 kb and the overall homology less than 40% identical to  
58 bacillariornavirus sequences deposited in GenBank. We detected reads from small  
59 single-stranded RNA viruses in many samples—mostly UAFI patients but also some  
60 afebrile controls (we detected  $\geq 5$  bacillariornavirus reads in 65 different libraries). One  
61 sample contained more than 15,000 bacillariornavirus reads (median 198  
62 reads/sample). Because these viruses appear in both UAFI and afebrile controls, we  
63 think they are likely contaminants. Also, some of these viruses resemble ubiquitous  
64 picornaviruses often found in aquatic or other environmental samples. These viruses  
65 could have been introduced into the samples if dust, dirt or contaminated water at one  
66 of the processing steps.

67

### 68 **Ekpoma-1 and -2**

69 Ekpoma-1 was discovered in a pool of 15 afebrile individuals (sample HP1\_LIB11-18)  
70 and Ekpoma-2 discovered in a pool of 16 individuals (sample DFultra2). In both cases  
71 reads similar to rhabdovirus sequences deposited in GenBank were identified through  
72 BLASTx searches.
