# Supplementary material for: Discovery of Novel Rhabdoviruses in the Blood of Healthy Individuals from West Africa
Source: PLoS Negl Trop Dis. 2015 Mar 17;9(3):e0003631. doi: 10.1371/journal.pntd.0003631 (PMC4363514; doi:10.1371/journal.pntd.0003631)
Supplement: S2 Table — For extraction method, ‘direct’ refers to RNA extracted directly from plasma using the QIAamp Viral RNA Extraction Kit and ‘ultracentrifugation’ refers to plasma that is pooled and subjected to ultracentrifugation before RNA is extracted from the resulting pellet. RT method refers to cDNA synthesis and carrier RNA removal: (1) ‘random’ refers to samples without carrier RNA in which RNA was primed with random hexamers; (2) ‘mod-hex’ refers to samples with carrier RNA in which RNA was primed with a modified-hexamer as described in Materials and Methods; (3) ‘random-PP’ refers to samples with carrier RNA that in which the RNA was primed using random hexamers and then carrier RNA removed (after cDNA synthesis) using Pippin Prep size selection. (XLSX) [file pntd.0003631.s013.xlsx]

## Sheet: Seq data on libraries
Sample	Phenotype	Country	Type	Carrier RNA added?	Extraction Method	RT method
3	FUO	Nigeria	Single	Yes	Direct	mod-hex
4	FUO	Nigeria	Single	Yes	Direct	mod-hex
8	FUO	Nigeria	Single	Yes	Direct	mod-hex
10	FUO	Nigeria	Single	Yes	Direct	mod-hex
14	FUO	Nigeria	Single	Yes	Direct	mod-hex
15	FUO	Nigeria	Single	Yes	Direct	mod-hex
108	FUO	Nigeria	Single	Yes	Direct	mod-hex
137	FUO	Nigeria	Single	Yes	Direct	mod-hex
173	FUO	Nigeria	Single	Yes	Direct	mod-hex
245	FUO	Nigeria	Single	Yes	Direct	random-PP
312	FUO	Nigeria	Single	Yes	Direct	random-PP
316	FUO	Nigeria	Single	Yes	Direct	random-PP
319	FUO	Nigeria	Single	Yes	Direct	random-PP
325	FUO	Nigeria	Single	Yes	Direct	random-PP
329	FUO	Nigeria	Single	Yes	Direct	random-PP
330	FUO	Nigeria	Single	Yes	Direct	random-PP
338	FUO	Nigeria	Single	Yes	Direct	random-PP
454	FUO	Nigeria	Single	Yes	Direct	random-PP
474	FUO	Nigeria	Single	Yes	Direct	random-PP
513	FUO	Nigeria	Single	Yes	Direct	random-PP
582	FUO	Nigeria	Single	Yes	Direct	random-PP
591	FUO	Nigeria	Single	Yes	Direct	random-PP
602	FUO	Nigeria	Single	Yes	Direct	random-PP
630	FUO	Nigeria	Single	Yes	Direct	random-PP
631	FUO	Nigeria	Single	Yes	Direct	random-PP
632	FUO	Nigeria	Single	Yes	Direct	random-PP
852	FUO	Nigeria	Single	Yes	Direct	mod-hex
989	FUO	Nigeria	Single	Yes	Direct	mod-hex
996	FUO	Nigeria	Single	Yes	Direct	mod-hex
1001	FUO	Nigeria	Single	Yes	Direct	mod-hex
1011	FUO	Nigeria	Single	Yes	Direct	mod-hex
1014	FUO	Nigeria	Single	Yes	Direct	mod-hex
1017	FUO	Nigeria	Single	Yes	Direct	mod-hex
1023	FUO	Nigeria	Single	Yes	Direct	mod-hex
1032	FUO	Nigeria	Single	No	Direct	random
1045	FUO	Nigeria	Single	No	Direct	random
1049	FUO	Nigeria	Single	No	Direct	random
1051	FUO	Nigeria	Single	No	Direct	random
1052	FUO	Nigeria	Single	No	Direct	random
1055	FUO	Nigeria	Single	No	Direct	random
1056	FUO	Nigeria	Single	No	Direct	random
1059	FUO	Nigeria	Single	No	Direct	random
1068	FUO	Nigeria	Single	No	Direct	random
1070	FUO	Nigeria	Single	No	Direct	random
1071	FUO	Nigeria	Single	No	Direct	random
1072	FUO	Nigeria	Single	No	Direct	random
1078	FUO	Nigeria	Single	No	Direct	random
1079	FUO	Nigeria	Single	Yes	Direct	mod-hex
1081	FUO	Nigeria	Single	No	Direct	random
1083	FUO	Nigeria	Single	No	Direct	random
1085	FUO	Nigeria	Single	No	Direct	random
1086	FUO	Nigeria	Single	No	Direct	random
1088	FUO	Nigeria	Single	No	Direct	random
1089	FUO	Nigeria	Single	No	Direct	random
1093	FUO	Nigeria	Single	No	Direct	random
1094	FUO	Nigeria	Single	No	Direct	random
1098	FUO	Nigeria	Single	No	Direct	random
1099	FUO	Nigeria	Single	No	Direct	random
1102	FUO	Nigeria	Single	No	Direct	random
1103	FUO	Nigeria	Single	No	Direct	random
1104	FUO	Nigeria	Single	No	Direct	random
1106	FUO	Nigeria	Single	No	Direct	random
1107	FUO	Nigeria	Single	No	Direct	random
1113	FUO	Nigeria	Single	No	Direct	random
1116	FUO	Nigeria	Single	No	Direct	random
1120	FUO	Nigeria	Single	No	Direct	random
1122	FUO	Nigeria	Single	No	Direct	random
1123	FUO	Nigeria	Single	No	Direct	random
1130	FUO	Nigeria	Single	Yes	Direct	mod-hex
1133	FUO	Nigeria	Single	No	Direct	random
1135	FUO	Nigeria	Single	No	Direct	random
2000	FUO	Nigeria	Single	No	Direct	random
2001	FUO	Nigeria	Single	No	Direct	random
2002	FUO	Nigeria	Single	No	Direct	random
2003	FUO	Nigeria	Single	No	Direct	random
2004	FUO	Nigeria	Single	No	Direct	random
2017	FUO	Nigeria	Single	No	Direct	random
2018	FUO	Nigeria	Single	No	Direct	random
2019	FUO	Nigeria	Single	No	Direct	random
2035	FUO	Nigeria	Single	No	Direct	random
2036	FUO	Nigeria	Single	No	Direct	random
2038	FUO	Nigeria	Single	No	Direct	random
2039	FUO	Nigeria	Single	No	Direct	random
2040	FUO	Nigeria	Single	No	Direct	random
2041	FUO	Nigeria	Single	No	Direct	random
2045	FUO	Nigeria	Single	No	Direct	random
2047	FUO	Nigeria	Single	No	Direct	random
2048	FUO	Nigeria	Single	No	Direct	random
2052	FUO	Nigeria	Single	No	Direct	random
2070	FUO	Nigeria	Single	No	Direct	random
102C	Healthy	Nigeria	Single	No	Direct	random
102F	Healthy	Nigeria	Single	No	Direct	random
102M	Healthy	Nigeria	Single	No	Direct	random
111C	Healthy	Nigeria	Single	No	Direct	random
111F	Healthy	Nigeria	Single	No	Direct	random
111M	Healthy	Nigeria	Single	No	Direct	random
114C	Healthy	Nigeria	Single	No	Direct	random
114F	Healthy	Nigeria	Single	No	Direct	random
114M	Healthy	Nigeria	Single	No	Direct	random
11C	Healthy	Nigeria	Single	No	Direct	random
11F	Healthy	Nigeria	Single	No	Direct	random
11M	Healthy	Nigeria	Single	No	Direct	random
120C	Healthy	Nigeria	Single	No	Direct	random
120F	Healthy	Nigeria	Single	No	Direct	random
120M	Healthy	Nigeria	Single	No	Direct	random
1C	Healthy	Nigeria	Single	No	Direct	random
1F	Healthy	Nigeria	Single	No	Direct	random
1M	Healthy	Nigeria	Single	No	Direct	random
230C	Healthy	Nigeria	Single	No	Direct	random
230F	Healthy	Nigeria	Single	No	Direct	random
230M	Healthy	Nigeria	Single	No	Direct	random
2C	Healthy	Nigeria	Single	No	Direct	random
2F	Healthy	Nigeria	Single	No	Direct	random
2M	Healthy	Nigeria	Single	No	Direct	random
49C_HiSeq	Healthy	Nigeria	Single	No	Direct	random
49F	Healthy	Nigeria	Single	No	Direct	random
49M	Healthy	Nigeria	Single	No	Direct	random
54C	Healthy	Nigeria	Single	No	Direct	random
54F	Healthy	Nigeria	Single	No	Direct	random
54M	Healthy	Nigeria	Single	No	Direct	random
572-PP	FUO	Nigeria	Single	Yes	Direct	random-PP
587-hex	FUO	Nigeria	Single	Yes	Direct	mod-hex
592-hex	FUO	Nigeria	Single	Yes	Direct	mod-hex
5Healthy_243M_Pippin_Prep	Healthy	Nigeria	Single	No	Direct	random
620-PP	FUO	Nigeria	Single	Yes	Direct	random-PP
9C	Healthy	Nigeria	Single	No	Direct	random
9F	Healthy	Nigeria	Single	No	Direct	random
9M	Healthy	Nigeria	Single	No	Direct	random
DF_LIB1	Healthy	Nigeria	Pool	No	Ultracentrifuge	random
DF_LIB2	Healthy	Nigeria	Pool	No	Ultracentrifuge	random
DF_LIB3	Healthy	Nigeria	Pool	No	Ultracentrifuge	random
DF_LIB4	Healthy	Nigeria	Pool	No	Ultracentrifuge	random
DF_LIB5	Healthy	Nigeria	Pool	No	Ultracentrifuge	random
DF_LIB6	Healthy	Nigeria	Pool	No	Ultracentrifuge	random
DF_LIB7	Healthy	Nigeria	Pool	No	Ultracentrifuge	random
DF_LIB8	Healthy	Nigeria	Pool	No	Ultracentrifuge	random
DFultra1	Healthy	Nigeria	Pool	No	Ultracentrifuge	random
DFultra2	Healthy	Nigeria	Pool	No	Ultracentrifuge	random
FUOP1	FUO	Nigeria	Pool	Yes	Direct	mod-hex
FUOP1_LIB11-18	FUO	Nigeria	Pool	No	Direct	random
FUOP2	FUO	Nigeria	Pool	Yes	Direct	mod-hex
FUOP2_LIB11-18	FUO	Nigeria	Pool	No	Direct	random
FUOP3	FUO	Nigeria	Pool	Yes	Direct	mod-hex
FUOP3_LIB11-18	FUO	Nigeria	Pool	No	Direct	random
FUOP4	FUO	Nigeria	Pool	Yes	Direct	mod-hex
FUOP4_LIB11-18	FUO	Nigeria	Pool	No	Direct	random
FUOP5	FUO	Nigeria	Pool	Yes	Direct	mod-hex
FUOP6	FUO	Nigeria	Pool	Yes	Direct	mod-hex
FUOP7	FUO	Nigeria	Pool	Yes	Direct	mod-hex
FUOP8	FUO	Nigeria	Pool	Yes	Direct	mod-hex
H_ultra_p1	Healthy	Nigeria	Pool	No	Ultracentrifuge	random
H_ultra_p2	Healthy	Nigeria	Pool	No	Ultracentrifuge	random
HP1	Healthy	Nigeria	Pool	No	Direct	random
HP1_LIB11-18	Healthy	Nigeria	Pool	No	Direct	random
HP2	Healthy	Nigeria	Pool	No	Direct	random
HP2_LIB11-18	Healthy	Nigeria	Pool	No	Direct	random
HP3	Healthy	Nigeria	Pool	No	Direct	random
HP4	Healthy	Nigeria	Pool	No	Direct	random
HP5	Healthy	Nigeria	Pool	No	Direct	random
HP6	Healthy	Nigeria	Pool	No	Direct	random
HP7	Healthy	Nigeria	Pool	No	Direct	random
HP8	Healthy	Nigeria	Pool	No	Direct	random
K562	control RNA	US	Single	No	Direct	random
K562_LIB11-18	Control RNA	US	Single	No	Direct	random
LIB10_pool1	Healthy	Nigeria	Pool	No	Direct	random
LIB10_pool10	FUO	Nigeria	Pool	Yes	Direct	mod-hex
LIB10_pool11	FUO	Nigeria	Pool	Yes	Direct	mod-hex
LIB10_pool12	FUO	Nigeria	Pool	Yes	Direct	mod-hex
LIB10_pool13	FUO	Nigeria	Pool	Yes	Direct	mod-hex
LIB10_pool14	FUO	Nigeria	Pool	Yes	Direct	mod-hex
LIB10_pool15	FUO	Nigeria	Pool	Yes	Direct	mod-hex
LIB10_pool16	Healthy	Nigeria	Pool	No	Direct	random
LIB10_pool2	FUO	Nigeria	Pool	Yes	Direct	mod-hex
LIB10_pool3	FUO	Nigeria	Pool	Yes	Direct	mod-hex
LIB10_pool4	FUO	Nigeria	Pool	Yes	Direct	mod-hex
LIB10_pool5	FUO	Nigeria	Pool	Yes	Direct	mod-hex
LIB10_pool6	FUO	Nigeria	Pool	Yes	Direct	mod-hex
LIB10_pool7	FUO	Nigeria	Pool	Yes	Direct	mod-hex
LIB10_pool8	FUO	Nigeria	Pool	Yes	Direct	mod-hex
LIB10_pool9	FUO	Nigeria	Pool	Yes	Direct	mod-hex
